# Supplementary material
Source: PubMed Central journal article supplement (PMC6542883)
Supplement: 12178_2019_9537_MOESM1_ESM.pdf [file 12178_2019_9537_MOESM1_ESM.pdf]

# Norwich Patellar Instability Score

|                                                |            |
|------------------------------------------------|------------|
| Name/address/hospital no (affix patient label) | LEFT/RIGHT |
|                                                | Date       |

Below is a list of activities which may cause your knee cap to feel like it will “pop out” of joint or feel unstable.

Please read through each statement, ticking the box which best describes how often your knee cap feels like it will “pop out” of joint or feels unstable when you are doing each of the following activities. *(Please tick one box for every question)*

---

**1. Twisting/changing direction during sports/games**

Always  Often  Sometimes  Rarely  Never  Do not do

**2. Changing direction when running**

Always  Often  Sometimes  Rarely  Never  Do not do

**3. Running in a straight line on *uneven* surfaces**

Always  Often  Sometimes  Rarely  Never  Do not do

**4. Walking on slippery, wet or icy surfaces**

Always  Often  Sometimes  Rarely  Never  Do not do

**5. Running sideways**

Always  Often  Sometimes  Rarely  Never  Do not do

**6. Hopping**

Always  Often  Sometimes  Rarely  Never  Do not do

**7. Jumping**

Always  Often  Sometimes  Rarely  Never  Do not do

**8. Running in a straight line on *even* surfaces**

Always  Often  Sometimes  Rarely  Never  Do not do

**9. Going down stairs**

Always  Often  Sometimes  Rarely  Never  Do not do

**10. Squatting**

Always  Often  Sometimes  Rarely  Never  Do not do

**11. Kneeling**

Always  Often  Sometimes  Rarely  Never  Do not do

**12. Walking in a straight line on *uneven* surfaces**

Always  Often  Sometimes  Rarely  Never  Do not do

**13. Climbing stairs**

Always  Often  Sometimes  Rarely  Never  Do not do

**14. Stepping onto or over a high step**

Always  Often  Sometimes  Rarely  Never  Do not do

**15. Crossing your legs when sitting**

Always  Often  Sometimes  Rarely  Never  Do not do

**16. Walking in a straight line on *even* surfaces**

Always  Often  Sometimes  Rarely  Never  Do not do

**17. Getting into or out of a car**

Always  Often  Sometimes  Rarely  Never  Do not do

**18. Turning a heavy trolley round a supermarket aisle**

Always  Often  Sometimes  Rarely  Never  Do not do

**19. Turning to look over your shoulder**

Always  Often  Sometimes  Rarely  Never  Do not do
